# Supplementary material
Source: Springer Nature journal article supplement (https://www.springermedizin.de/resource/supplementary/12880_2014_236_MOESM1_ESM.pdf/9450304)

- Pseudo-anatomical
- Anatomical

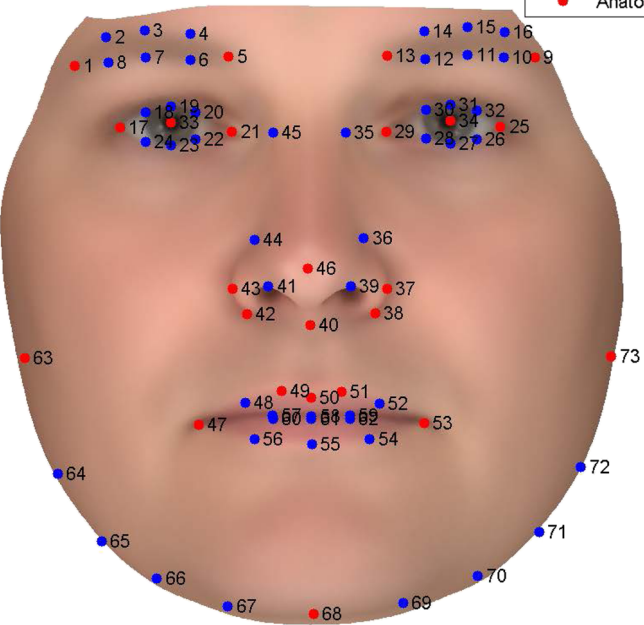

Supplement: MOESM1 [file 9450304]
